# Supplementary figures and images for: Enzyme-free selective determination of H2O2and glucose using functionalized CuNP-modified graphite electrode in room temperature ionic liquid medium
Source: Royal Society of Chemistry journal article supplement (doi:10.1039/c4ra04507f), 2014-01-01

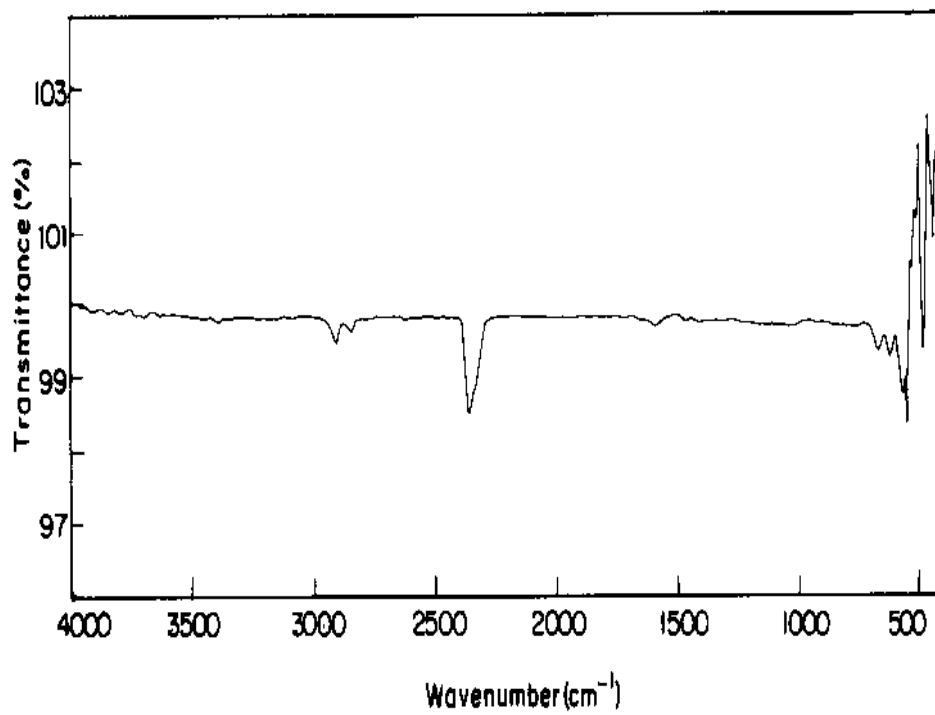

Fig. S1

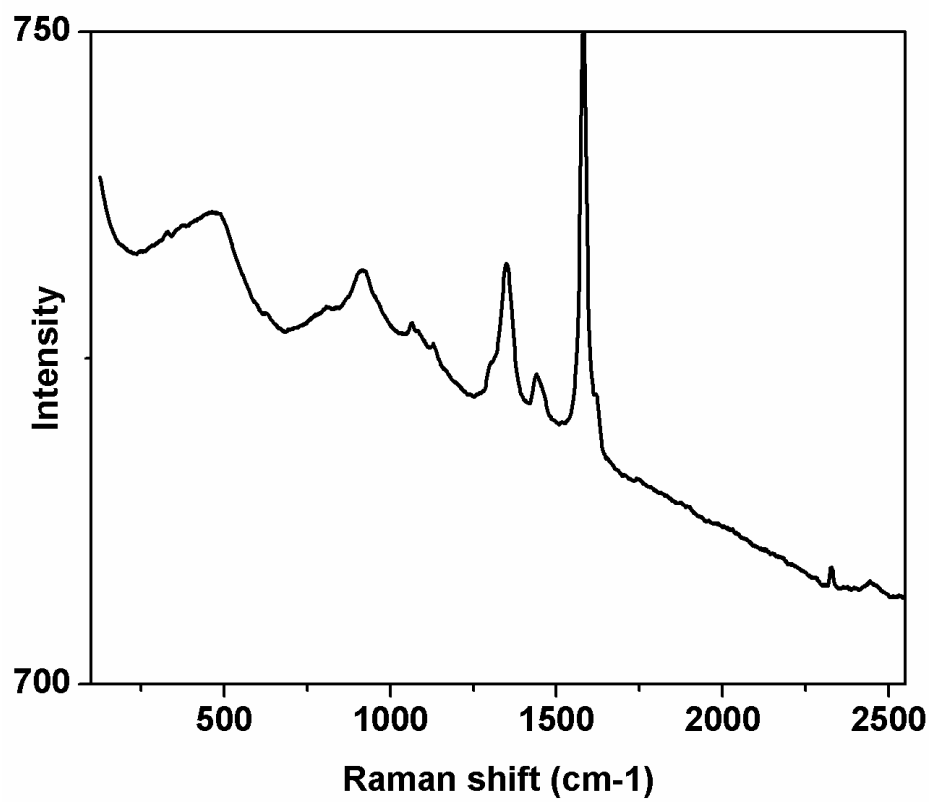

Fig. S2

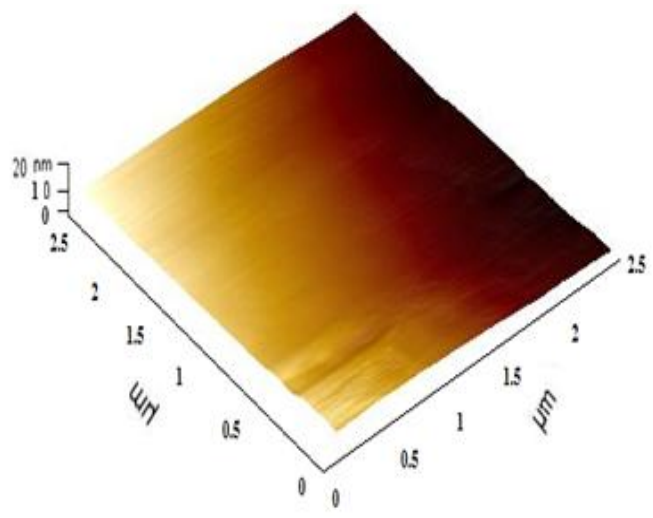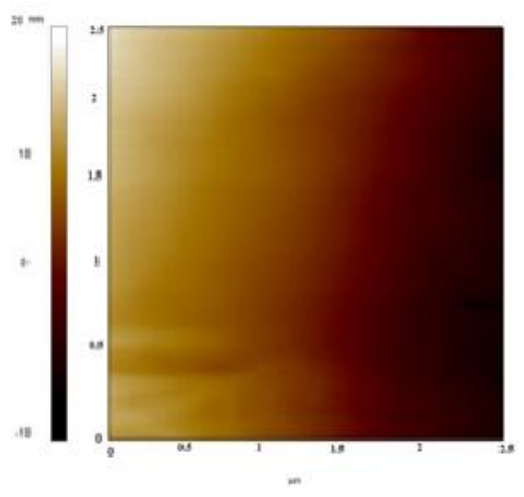

Fig. S3

Supplement: c4ra04507f1.pdf [file c4ra04507f1.pdf]
